# Supplementary material for: Ceruloplasmin-Deficient Mice Show Dysregulation of Lipid Metabolism in Liver and Adipose Tissue Reduced by a Protein Replacement
Source: MDPI journal article supplement (doi:10.3390/ijms24021150), 2023-01-06
Supplement: s1 [file s1]

## **Supplementary Materials**

### **Ceruloplasmin-deficient mice show lipid metabolism dysregulation in liver and adipose tissue reduced by the protein replacement**

Raia S, Conti A, Zanardi A, Ferrini B, Scotti MG, Gilberti E, De Palma G, David S, Alessio M

#### **Inventory of Supplementary Materials:**

**Supplementary Material Figures S1 – S5**

**Supplementary Materials Table S1**

## Supplementary Material Figure S1

### Analysis of ceruloplasmin expression level in liver and perigonadal adipose tissue in C57Bl/6J wild-type mice

*Western blot analysis:* Liver and perigonadal adipose tissues (pgAT) from C57Bl/6J wild-type mice were homogenized in the presence of lysis buffer (PBS, 1% TritonX100, protease inhibitors). Protein from extracts (30 µg each sample) were resolved on 10%-acrylamide SDS-PAGE and analyzed by Western blot to measure the tissue difference in ceruloplasmin expression, normalize for the total protein content, using Goat anti-Cp antibody (Abcam, ab19171) followed by HRP conjugated secondary antibody incubation and enhanced chemiluminescence development.

*Densitometric analysis:* Densitometric analysis were performed using ImageJ software, and data are presented as signal ratio between pgAT/Liver for each mouse, the result shows the ceruloplasmin expression in pgAT is about two-fold increased than liver tissue homogenates.

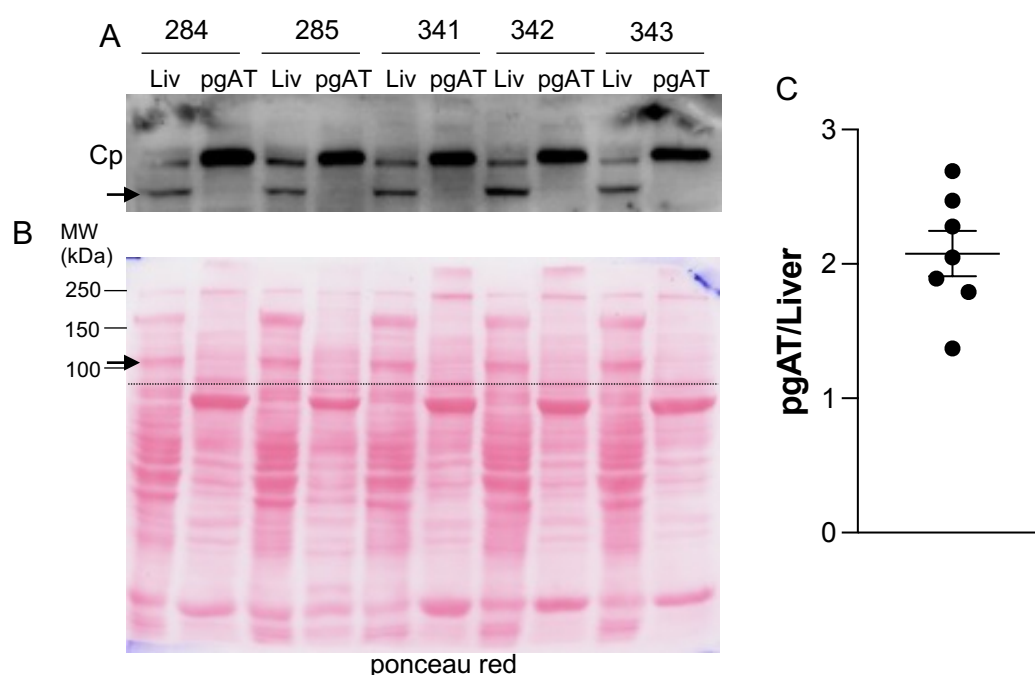

**Figure S1.** A) Representative images of Western blot (WB) analysis in five out of seven samples of liver and pgAT homogenates from different mouse (n=7), showed the higher expression level of Cp protein in pgAT compared to liver. B) Nitrocellulose filter of the representative WB showed in A stained with Ponceau-red that was used as an internal loading control for quantitative analysis. Arrows indicate the non-specific background signal in liver extracts corresponding to the large protein band visible in the ponceau red stained nitrocellulose. C) Quantitation of the relative Cp abundance reported as signal ratio between pgAT/Liver for each mouse.

## Supplementary Material Figure S2

### Histological analysis of liver fibrosis by Sirius red staining

Tissues from CpKO and WT mice of 10 months of age were fixed in 4% paraformaldehyde and paraffin embedded. Sirius Red staining was performed on 3  $\mu\text{m}$  thick section at the Animal Histopathology facility, HSR. Samples were analyzed with Zeiss AxioImager microscope.

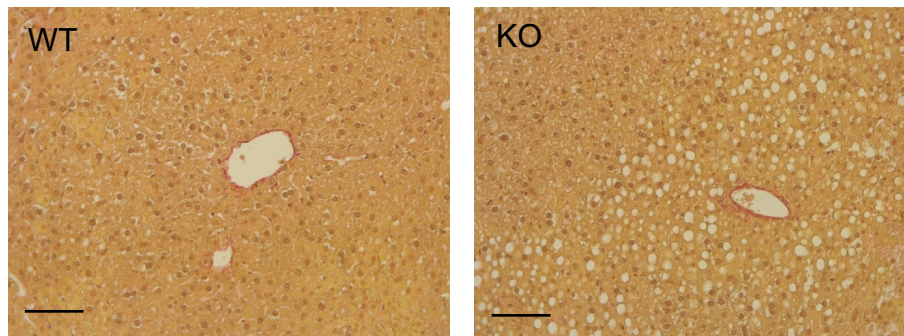

**Figure S2.** Representative images of Sirius Red histological staining on liver sections from 10 months-old WT and CpKO mice. Scale bars= 100  $\mu\text{m}$ .

### Supplementary Material Figure S3

#### Analysis of total copper and zinc ions content in liver.

Quantitative analysis of total copper and zinc metal ions content in the liver of 10 months old mice was performed by inductively coupled plasma mass spectrometry (ICP-MS) as described in Materials and Methods.

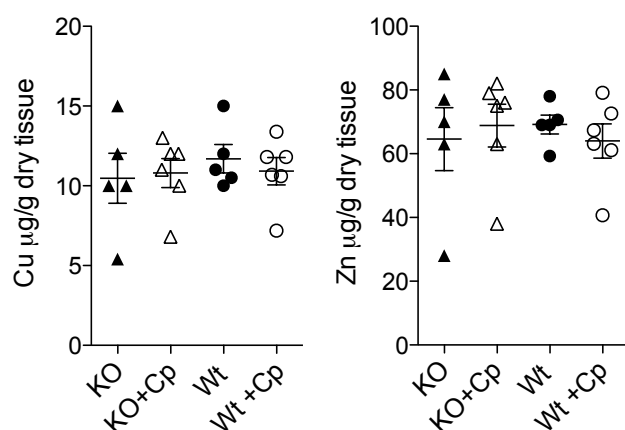

**Figure S3.** Copper (Cu) and zinc (Zn) metal ions evaluation in liver of ceruloplasmin-deficient (CpKO) and wild-type (WT) mice untreated or treated for 2 months with purified human ceruloplasmin (Cp) as reported in Materials and Methods. Data are reported as mean $\pm$ SEM of the concentration in  $\mu\text{g/g}$  of dry (lyophilized) tissue of the animal groups; each dot corresponds to one animal (CpKO, WT n= 5; CpKO+Cp, WT+Cp, n=6).

## Supplementary Material Figure S4

Adipose tissue accumulation in CpKO mice.

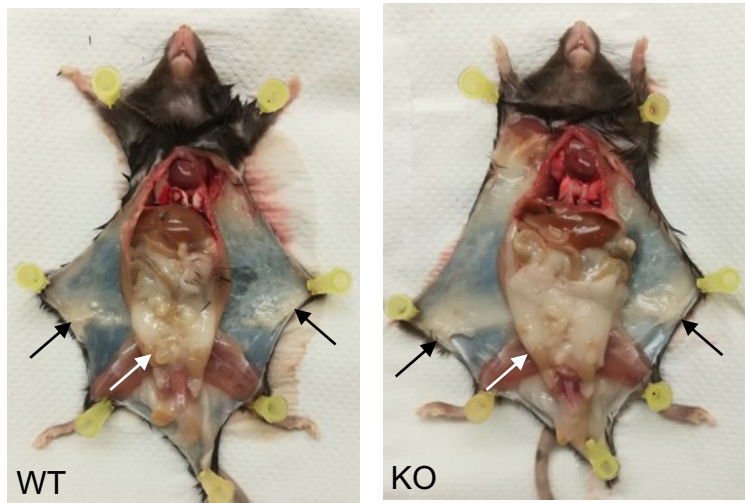

**Figure S4.** Representative images of perigonadal (white arrows) and sub-cutaneous (black arrows) adipose tissue accumulation in 10 months-old CpKO and WT mice.

## Supplementary Material Figure S5

### Analysis of adipocytes hypertrophy in CpKO mice.

To assess whether the adipose tissue mass increase at 10 months of age in CpKO mice was also paralleled by adipocytes hypertrophy, we measured the size of the adipocytes of perigonadal adipose tissue. Tissues were fixed in 4% paraformaldehyde (1 h at 4°C), transferred in 70% ethanol solution and 24 h later embedded in paraffin. Hematoxylin-eosin staining was performed on 3  $\mu$ m thick section at the Animal Histopathology facility at OSR. Samples were analyzed with Zeiss AxioImager microscope. Adipocytes' size was quantified on histological images with an automated analysis protocol for area and diameter detection, set up on ImageJ software. Images were segmented by a threshold filtration to define the adipocytes boundaries, and then area and Feret's diameter for each cell was analyzed. Five images per mouse were acquired with on average 86 adipocytes/image (range 59-127), for a total of 430 adipocytes/mouse measured on average. Even if two-ways ANOVA was not significant, the CpKO mice showed small enlargement of adipocytes size and diameter compared to WT mice suggesting slight hypertrophy of adipocytes in Cp-deficient mice.

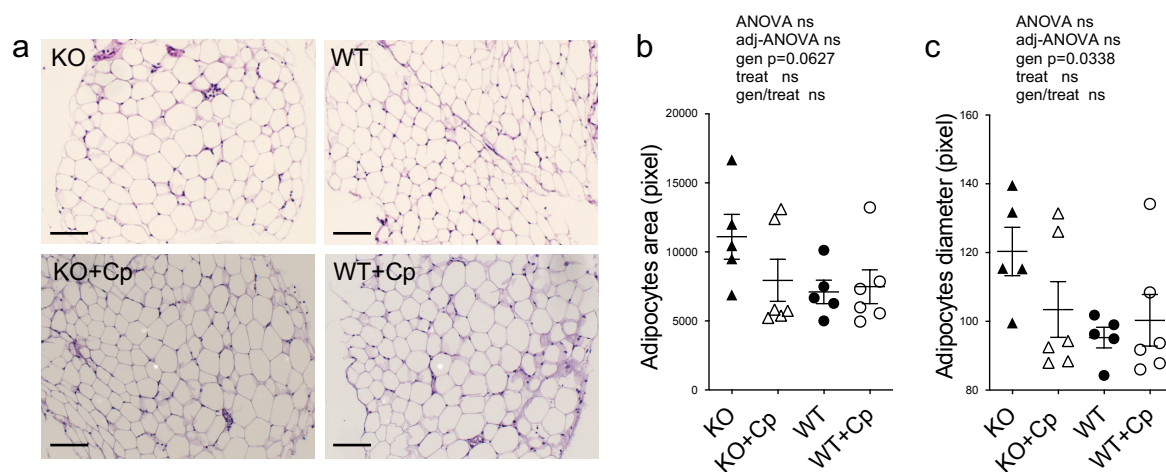

**Figure S5.** Adipocytes hypertrophy analysis in perigonadal adipose tissue (pgAT) of mice at 10 months of age after 2 months of treatment with intraperitoneal injection of Cp 5  $\mu$ g/g, administered every 5 days (KO+Cp; WT+Cp) or saline (KO, WT). (a) Representative histological paraffin sections (3  $\mu$ m thick) stained by hematoxylin-eosin of pgAT from mice. (b, c) Analysis of adipocyte size reported as pixel area (b) and Feret's diameter (c). The analysis was performed with ImageJ software. Data: mean $\pm$ SEM of animal groups, each dot corresponds to one animal (CpKO, WT n= 5; CpKO+Cp, WT+Cp, n=6); statistical p values were evaluated by two-ways ANOVA and reported as value for ANOVA, value for Benjamini-Hochberg adjustment for multiple ANOVA tests related to adipose tissue features (adj-ANOVA), genotype variable (gen), treatment variable (treat) and the interaction of genotype/ treatment (gen/ treat). Scale bars= 100  $\mu$ m.

Supplementary Material Table S1

| mouse                                                                                                                                                                                                                                                                                 |        | body weight |        |         | liver  |                  |            |                |                   |           |           |           |                      |      | pgAT |               |       |             |                 |                     |                 |           |           |           | sub-eAT              |      | serum |               |                     |                |             |              |         |
|---------------------------------------------------------------------------------------------------------------------------------------------------------------------------------------------------------------------------------------------------------------------------------------|--------|-------------|--------|---------|--------|------------------|------------|----------------|-------------------|-----------|-----------|-----------|----------------------|------|------|---------------|-------|-------------|-----------------|---------------------|-----------------|-----------|-----------|-----------|----------------------|------|-------|---------------|---------------------|----------------|-------------|--------------|---------|
| #                                                                                                                                                                                                                                                                                     | label  | sex         | 8m (g) | 10m (g) | Cp #   | Oil red (area %) | Tg (μg/mg) | F4/80 (area %) | IL18 (fold of WT) | Fe (μg/g) | Cu (μg/g) | Zn (μg/g) | Hepc (pg/μg OD (au)) | Ft   | Fpn  | TR1 (OD (au)) | Cp #  | Weight (mg) | Ad size (pixel) | Ad diameter (pixel) | F4/80 (cells %) | Fe (μg/g) | Cu (μg/g) | Zn (μg/g) | Hepc (pg/μg OD (au)) | Ft   | Fpn   | TR1 (OD (au)) | Adiponectin (ng/mg) | Leptin (ng/mg) | Weight (mg) | sub-eAT (mg) | Tg (mM) |
| 281                                                                                                                                                                                                                                                                                   | KO     | 2           | 29.65  | 31.91   | -0.036 | 3.94             | 26.83      | 8.92           | 5.46              | 2580      | 15        | 85        | 105.2                | 1.55 | 2.21 | 1.8           | 0.075 | 1272        | 9505            | 115.4               | 38.09           | 33.2      | 0.24      | 1.7       | 58.4                 | 0.99 | 2.8   | 0.13          | 454.6               | 18.37          | 1000        | 971          | 0.66    |
| 321                                                                                                                                                                                                                                                                                   | KO     | 2           | 34.92  | 36.67   | -0.009 | 5.58             | 25.95      | 8.55           | 6.19              | 1616      | 12        | 77        | 102.2                | 0.54 | 4.12 | 1.2           | 0.072 | 1675        | 12004           | 131.8               | 32.05           | 24.9      | 0.19      | 1.3       | 8.8                  | 2.16 | 3.8   | 0.1           | 225.3               | 29.29          | 971         | 107          | 0.57    |
| 331                                                                                                                                                                                                                                                                                   | KO     | 1           | 43.05  | 47.05   | 0.046  | 6.87             | 34.9       | 10.37          | 6.27              | 1222      | 10        | 70        | 172.6                | 0.18 | 1.4  | 1.2           | 0.057 | 946         | 10454           | 115.3               | 49.97           | 6.5       | 0.14      | 1.2       | 27.5                 | 1.43 | 3.2   | 0.24          | 133.4               | 37.04          | 1157        | 102          | 1.02    |
| 4                                                                                                                                                                                                                                                                                     | KO     | 1           | 48.6   | 53.7    | -0.034 | 3.42             | 26.83      | 7.78           | 5.62              | 495       | 5.4       | 28        | 135.5                | 0.12 | 2.77 | 1.3           | 0.048 | 1476        | 16674           | 139.6               | 58.16           | 7.7       | 0.13      | 1.3       | 36.1                 | 0.97 | 1.7   | 0.14          | 232.3               | 17.55          | 1152        | 107          | 0.78    |
| 7                                                                                                                                                                                                                                                                                     | KO     | 2           | 36     | 38.3    | 0.034  | 3.94             | 49.68      | 11.73          | 6.21              | 1763      | 10        | 63        | 175.0                | 1.24 | 1.33 | 1.7           | 0.111 | 1460        | 6887            | 99.6                | 37              | 2.2       | 0.12      | 2.6       | 47.1                 | 1.41 | 3.8   | 0.12          | 485.8               | 33.64          | 1535        | 114          | 1.14    |
| 21                                                                                                                                                                                                                                                                                    | KO+ Cp | 2           | 24.23  | 27      | 0.051  | 1.82             | 22.65      | 9.03           | 3.04              | 1400      | 13        | 79        | 90.2                 | 1.56 | 0.84 | 1.4           | 0.155 | 666         | 5223            | 88                  | 36.78           | 5.7       | 0.13      | 1         | 31.2                 | 0.28 | 2.7   | 0.25          | 664.5               | 18.81          | 836         | 107          | 0.26    |
| 301                                                                                                                                                                                                                                                                                   | KO+ Cp | 2           | 31.77  | 33.7    | 0.071  | 2.45             | 12.87      | 8.8            | 1.83              | 2239      | 12        | 82        | 110.6                | 1.33 | 0.2  | 1.6           | 0.181 | 1383        | 5738            | 136.1               | 34.46           | 16.7      | 0.12      | 1.2       | 2.4                  | 0.43 | 3     | 0.15          | 318.2               | 27.35          | 1029        | 107          | 0.43    |
| 291                                                                                                                                                                                                                                                                                   | KO+ Cp | 1           | 35.79  | 37.82   | 0.096  | 1.45             | 36.42      | 6.53           | 0.98              | 992       | 12        | 76        | 92.2                 | 0.26 | 2.32 | 1.4           | 0.137 | 1162        | 5817            | 92.5                | 33.98           | 6.7       | 0.1       | 1.1       | 4.7                  | 0.23 | 4     | 0.3           | 491.7               | 19.16          | 808         | 107          | 0.38    |
| 5                                                                                                                                                                                                                                                                                     | KO+ Cp | 1           | 43.7   | 46.4    | 0.37   | 1.53             | 39.26      | 7.6            | 2.29              | 4795      | 6.8       | 38        | 180.2                | 0.07 | 1.39 | 1.4           | 0.619 | 973         | 5388            | 94.3                | 31.79           | 6.2       | 0.14      | 1.3       | 40.0                 | 0.92 | 3     | 0.25          | 275.8               | 8.76           | 940         | 107          | 0.5     |
| 2                                                                                                                                                                                                                                                                                     | KO+ Cp | 2           | 35.1   | 37      | 0.522  | 1.96             | 17.45      | 6.97           | 1.11              | 932       | 11        | 75        | 128.8                | 0.45 | 1.81 | 1.6           | 0.378 | 722         | 12389           | 88.5                | 20.27           | 2.9       | 0.14      | 0.68      | 19.8                 | 1.08 | 1.9   | 0.11          | 624.3               | 7.87           | 498         | 107          | 0.9     |
| 6                                                                                                                                                                                                                                                                                     | KO+ Cp | 2           | 31.8   | 35.2    | 0.046  | 1.39             | 26.54      | 6.28           | 0.82              | 1204      | 10        | 63        | 143.8                | 1.1  | 1.34 | 1.4           | 0.473 | 1054        | 13102           | 131.4               | 27.67           | 4.8       | 0.12      | 0.79      | 16.5                 | 0.16 | 2     | 0.14          | 666.0               | 17.19          | 633         | 107          | 0.59    |
| 10                                                                                                                                                                                                                                                                                    | WT     | 1           | 30.5   | 30.9    | 0.337  | 1                | 4.72       | 6.92           | 1.62              | 160       | 15        | 69        | 117.7                | 0.12 | 0.38 | 1.2           | 0.412 | 1235        | 10117           | 99.1                | 18.98           | 6.5       | 0.18      | 1         | 4.5                  | 1.45 | 2.5   | 0.07          | 598.2               | 8.50           | 737         | 107          | 0.52    |
| 13                                                                                                                                                                                                                                                                                    | WT     | 2           | 28.9   | 27.17   | 0.117  | 0.9              | 10.51      | 5.8            | 0.58              | 550       | 11        | 69        | 122.9                | 0.13 | 2.04 | 1.7           | 0.374 | 1165        | 7486            | 101.8               | 22.88           | 11.4      | 0.2       | 1.1       | 30.2                 | 2.14 | 3.8   | 0.14          | 787.0               | 11.93          | 714         | 107          | 0.24    |
| 14                                                                                                                                                                                                                                                                                    | WT     | 2           | 30.8   | 29.99   | 0.334  | 0.48             | 10.81      | 7.62           | 1.91              | 951       | 10        | 78        | 127.6                | 0.18 | 1.28 | 1.6           | 0.263 | 897         | 5012            | 84.3                | 20.32           | 24.8      | 0.35      | 2.6       | 45.0                 | 1.8  | 2.8   | 0.08          | 245.3               | 1.41           | 790         | 107          | 0.31    |
| 22                                                                                                                                                                                                                                                                                    | WT     | 1           | 29.8   | 32.6    | 0.467  | 1.66             | 13.63      | 4.73           | 0.34              | 132.4     | 10.5      | 59.3      | 133.8                | 0.06 | 0.39 | 1.7           | 0.476 | 966         | 6672            | 96.3                | 20.26           | 10.6      | 0.16      | 1.5       | 32.7                 | 1.04 | 3.4   | 0.13          | 652.1               | 15.73          | 461         | 107          | 0.64    |
| 24                                                                                                                                                                                                                                                                                    | WT     | 2           | 27.4   | 26.2    | 0.278  | 0.76             | 2.27       | 5.65           | 0.59              | 792       | 12        | 70.6      | 181.8                | 0.13 | 0.98 | 2.1           | 0.453 | 870         | 6281            | 95                  | 23.35           | 14.2      | 0.23      | 1.5       | 30.7                 | 1.52 | 2     | 0.16          | 814.7               | 17.43          | 597         | 107          | 0.33    |
| 9                                                                                                                                                                                                                                                                                     | WT+ Cp | 1           | 29.3   | 30.53   | 0.33   | 0.59             | 12.87      | 4.5            | 0.24              | 169       | 13.4      | 63.1      | 111.8                | 0.09 | 1.23 | 1.7           | 0.469 | 663         | 5565            | 87.8                | 29.69           | 9.3       | 0.15      | 2.1       | 15.0                 | 0.93 | 3.1   | 0.18          | 308.5               | 6.48           | 567         | 107          | 0.38    |
| 11                                                                                                                                                                                                                                                                                    | WT+ Cp | 2           | 28.5   | 28.58   | 0.559  | 0.83             | 12         | 6.18           | 0.4               | 1077      | 11.8      | 79.1      | 100.8                | 0.11 | 1.03 | 2.3           | 0.48  | 815         | 5987            | 91.8                | 26.38           | 12.6      | 0.43      | 2.2       | 6.1                  | 0.91 | 2.5   | 0.11          | 675.0               | 13.52          | 1313        | 107          | 0.31    |
| 12                                                                                                                                                                                                                                                                                    | WT+ Cp | 2           | 28.7   | 29.55   | 0.335  | 1.22             | 12.54      | 6.43           | 0.85              | 798       | 10.7      | 72.6      | 118.2                | 0.1  | 0.97 | 1.5           | 0.44  | 1284        | 7326            | 93.7                | 26.34           | 24.1      | 0.23      | 1.5       | 29.1                 | 0.73 | 3.7   | 0.21          | 1221.0              | 7.44           | 839         | 107          | 0.24    |
| 21                                                                                                                                                                                                                                                                                    | WT+ Cp | 1           | 30.2   | 33.5    | 0.186  | 1.98             | 15.09      | 7.5            | 0.75              | 176       | 10.6      | 61.1      | 112.5                | 0.07 | 1.08 | 2.5           | 0.411 | 920         | 7865            | 108.4               | 31.61           | 8.5       | 0.15      | 0.9       | 22.9                 | 0.53 | 3.4   | 0.31          | 672.8               | 28.69          | 955         | 107          | 0.62    |
| 23                                                                                                                                                                                                                                                                                    | WT+ Cp | 2           | 28.3   | 26.9    | 0.273  | 1.28             | 16.79      | 5.33           | 0.39              | 517.4     | 7.2       | 40.7      | 139.5                | 0.15 | 0.84 | 2.1           | 0.547 | 1149        | 4953            | 86                  | 39.26           | 9.3       | 0.19      | 1.1       | 60.4                 | 0.76 | 4.7   | 0.29          | 971.7               | 15.38          | 589         | 107          | 0.57    |
| 25                                                                                                                                                                                                                                                                                    | WT+ Cp | 2           | 26.7   | 28      | 0.262  | 0.78             | 10.11      | 6.17           | 0.54              | 617       | 11.8      | 67.4      | 146.8                | 0.08 | 2    | 2.3           | 0.574 | 859         | 13217           | 134.2               | 27.53           | 20.9      | 0.73      | 0.8       | 34.6                 | 0.46 | 3     | 0.27          | 615.4               | 7.39           | 690         | 107          | 0.55    |
| Sex: 1= male, 2= female; 8m= 8 months; 10m= 10 months; Tg= triglycerides; Ft= ferritin; F4/80= macrophages marker; IL18= interleukin 1 beta; Hepc= hepcidin; Fpn= ferroportin 1; TR1= transferrin receptor 1; pgAT= perigonadal adipose tissue; sub-eAT= subcutaneous adipose tissue; |        |             |        |         |        |                  |            |                |                   |           |           |           |                      |      |      |               |       |             |                 |                     |                 |           |           |           |                      |      |       |               |                     |                |             |              |         |
| Ad= adipocytes; OD (au)= optical density, arbitrary units;                                                                                                                                                                                                                            |        |             |        |         |        |                  |            |                |                   |           |           |           |                      |      |      |               |       |             |                 |                     |                 |           |           |           |                      |      |       |               |                     |                |             |              |         |
| # = parameter not used for PCA analysis                                                                                                                                                                                                                                               |        |             |        |         |        |                  |            |                |                   |           |           |           |                      |      |      |               |       |             |                 |                     |                 |           |           |           |                      |      |       |               |                     |                |             |              |         |
